# Supplementary material
Source: PubMed Central journal article supplement (PMC4433743)

## Supplemental Figure Legends

**Supplementary Fig. 1: Characterization of multilayer PA Hydrogels.** (A) Force spectrogram from an AFM indentation of a multilayered PA hydrogel in a region lacking a microwire. Force data has been linearized and fit with a linearized Hertz model as outlined in the Materials and Methods section. One curve was able to fit the entire data set ( $r^2 = 0.998$ ), indicating one continuous layer at least through the maximum indentation point. (B) Confocal cross-section images of PA hydrogels containing fluorescent beads and microwires (open arrowheads) embedded in the top layer. Upon magnetic actuation, wrinkles that form are apparent from a change in fluorescent bead distribution and are highlighted by solid arrowheads. Scale bar is 5  $\mu\text{m}$ .

**Supplementary Fig. 2: Topographical Features Exceed Lateral Displacements.** Brightfield displacement map with x- and y-displacements denoted by the direction and magnitude of the arrows, and z-displacements denoted by color for samples of high (A) and low (B) surface roughness. The white shaded areas indicate regions within each image indicate where the x- and y-displacements exceed the z-displacements. Scale bar is 20  $\mu\text{m}$ . (C) Comparison of the average displacement ratio for z- divided by x- (left) and y-displacements (right). A displacement ratio of 1 indicated by the line shows would signify equal planar and vertical displacement.

**Supplementary Fig. 3: Topographical Features Do Not Undergo Viscoelastic Creep.** (A) Initial displacement field induced by a microwire in a magnetic field. (B) Image of the displacement field after a 20 h exposure to the magnetic field. (C) Surface roughness determined over the indicated time and conditions for regions with the same microwire density. Scale bar = 20  $\mu\text{m}$ .

**Supplementary Fig. 4: Protein Functionalization does not change with Hydrogel Deformation.** Images show a confocal cross-section through a hydrogel with and without a magnetic field present. Arrowheads indicate wire positions. Lateral and vertical scale bars are 20 and 50  $\mu\text{m}$ , respectively.

Figure S1

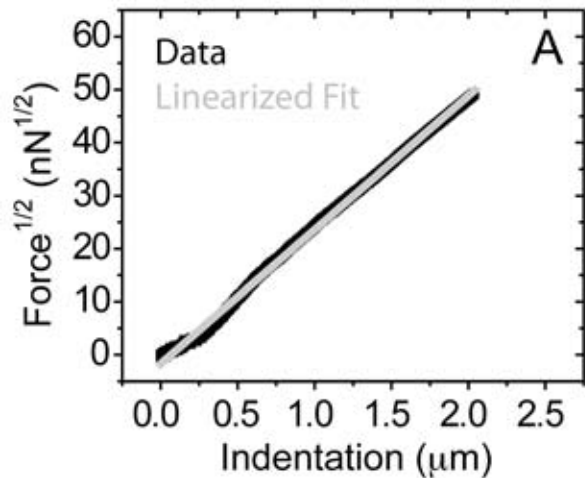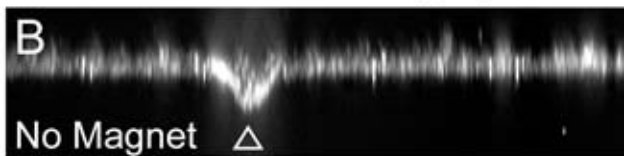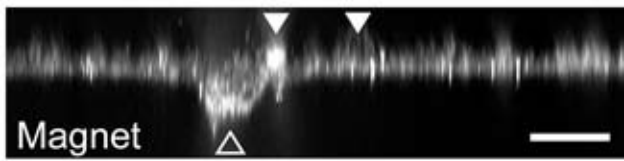

# Figure S2

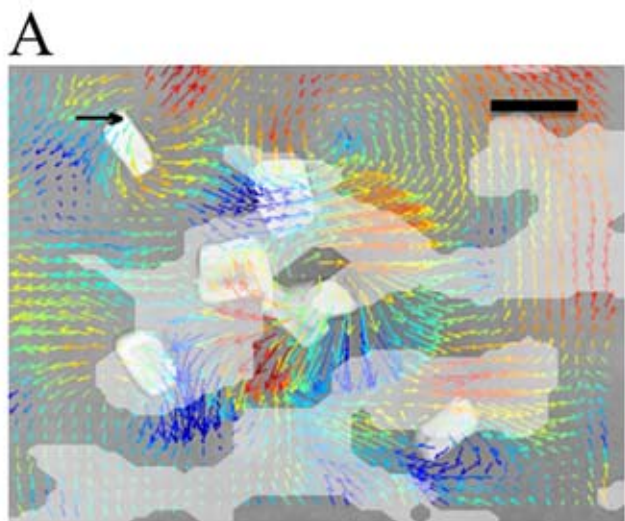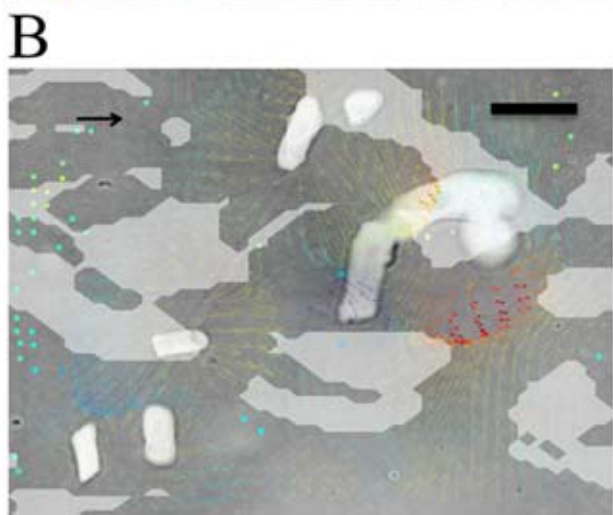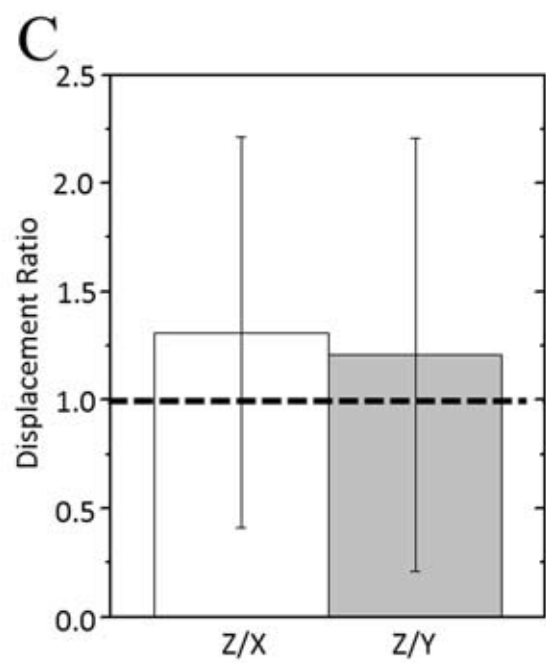

# Figure S3

## A

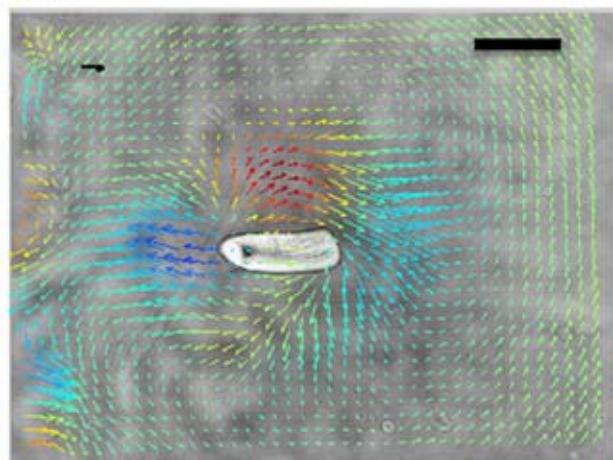

Initial Displacement ( $t = 0$  h)

## B

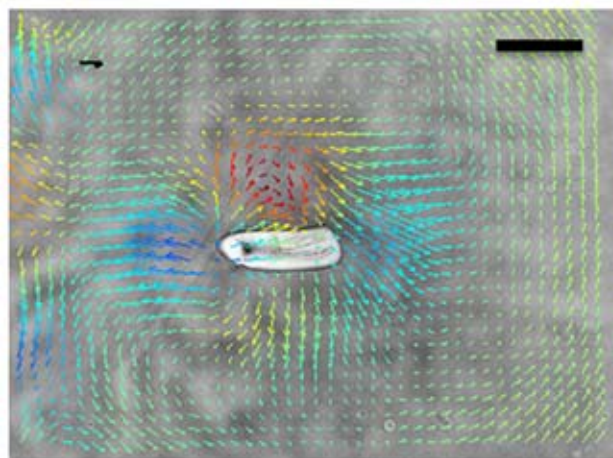

Final Displacement ( $t = 24$  h)

## C

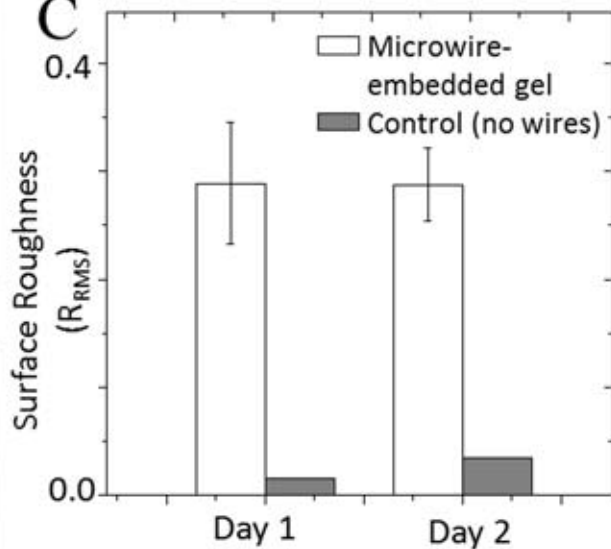

# Figure S4

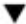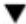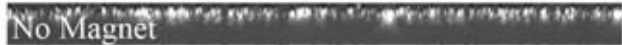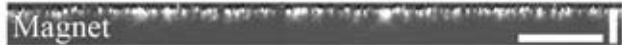

Supplement: NIHMS685903-supplement-All_Supplemental_Files.pdf [file NIHMS685903-supplement-All_Supplemental_Files.pdf]
